# Supplementary material
Source: publisher site journal article supplement (https://www.dovepress.com/article/432024)
Supplement: Supplementary file 1 [file get_supplementary_file.php]

**Table S1. All TDM Data-(1-40)**

|   | Date       | TDM of tacrolimus |    | Date       | TDM of cyclosporin |
|---|------------|-------------------|----|------------|--------------------|
| 1 | 2019-10-21 | 27.7              | 6  | 2022/7/1   | 551.6              |
| 2 | 2019-10-09 | 11.5              | 7  | 2022/7/1   | 79.1               |
| 3 | 2019-09-27 | 15.9              | 8  | 2022/3/29  | 79.3               |
| 4 | 2019-08-30 | 9.7               | 9  | 2022-01-24 | 645.2              |
| 5 | 2019-08-16 | 7.3               | 10 | 2022-01-24 | 86.5               |
|   |            |                   | 11 | 2021-08-30 | 89.4               |
|   |            |                   | 12 | 2021-07-12 | 98.5               |
|   |            |                   | 13 | 2021-05-21 | 95.8               |
|   |            |                   | 14 | 2021-05-07 | 63.7               |
|   |            |                   | 15 | 2021-05-07 | 543.3              |
|   |            |                   | 16 | 2021-02-22 | 620.4              |
|   |            |                   | 17 | 2021-02-22 | 115.3              |
|   |            |                   | 18 | 2021-01-18 | 180.5              |
|   |            |                   | 19 | 2020-12-21 | 612                |
|   |            |                   | 20 | 2020-12-21 | 119.6              |
|   |            |                   | 21 | 2020-11-20 | 930.4              |
|   |            |                   | 22 | 2020-11-20 | 177.6              |
|   |            |                   | 23 | 2020-09-09 | 392.1              |
|   |            |                   | 24 | 2020-09-09 | 93.1               |
|   |            |                   | 25 | 2020-08-05 | 375.6              |
|   |            |                   | 26 | 2020-08-05 | 64.8               |
|   |            |                   | 27 | 2020-06-24 | 754                |
|   |            |                   | 28 | 2020-06-24 | 102                |
|   |            |                   | 29 | 2020-03-18 | 410.2              |
|   |            |                   | 30 | 2020-03-18 | 115.2              |
|   |            |                   | 31 | 2020-02-17 | 251.8              |
|   |            |                   | 32 | 2020-01-22 | 312.8              |
|   |            |                   | 33 | 2019-12-11 | 917.2              |
|   |            |                   | 34 | 2019-12-11 | 219.8              |
|   |            |                   | 35 | 2019-12-02 | 487.2              |
|   |            |                   | 36 | 2019-11-29 | 131.4              |
|   |            |                   | 37 | 2019-11-18 | 207.2              |
|   |            |                   | 38 | 2019-11-18 | 24.8               |
|   |            |                   | 39 | 2019-11-04 | 810.4              |
|   |            |                   | 40 | 2019-11-04 | 119.9              |

**Table S2. Biochemical Indexes-(1-30)**

|    |                 | 1         | 2         | 3        | 4      | 5        | 6    | 7     |
|----|-----------------|-----------|-----------|----------|--------|----------|------|-------|
|    |                 | UREA      | CREA      | TBIL     | DBIL   | IBIL     | ALT  | AST   |
|    | unit            | mmol/L    | μmol/L    | μmol/L   | μmol/L | μmol/L   | U/L  | U/L   |
|    | Reference value | 1.43-7.14 | 35.0-80.0 | 2.0-20.4 | 0-6.8  | 1.7-19.8 | 7-40 | 13-35 |
| 1  | 20190124        | 2.6       | 14.5      | 131.1    | 81.5   | 49.6     | 161  | 189   |
| 2  | 20190806        | 5.61      | 39.7      | 4.2      | 2.1    | 2.1      | 19   | 33    |
| 3  | 20190827        | 9.54      | 67.1      | 6.4      | 3      | 3.4      | 12   | 28    |
| 4  | 20190913        | 17.13     | 71.8      | 2.9      | 1.3    | 1.6      | 15   |       |
| 5  | 20190927        |           |           | 2.8      | 1.1    | 1.7      | 15   | 32    |
| 6  | 20190928        | 12.68     | 69        | 2.7      | 1.4    | 1.3      | 9    | 26    |
| 7  | 20191021        | 6.4       | 45.8      | 5        | 2.1    | 2.9      | 9    | 31    |
| 8  | 20191031        | 6.47      | 39        | 5.3      | 1.9    | 3.4      | 10   | 23    |
| 9  | 20191115        | 1.83      | 31.7      | 3.4      | 1.5    | 1.9      | 11   | 35    |
| 10 | 20191126        | 4.24      | 33.2      | 5.4      | 2      | 3.4      | 14   | 32    |
| 11 | 20191130        | 2.09      | 26        | 4.5      | 1.8    | 2.7      | 27   | 34    |
| 12 | 20191211        | 6.94      | 37.3      | 6        | 2.3    | 3.7      | 10   | 25    |
| 13 | 20200213        | 4.49      | 32        | 5.4      | 2      | 3.4      | 16   | 33    |
| 14 | 20200213        | 3.47      | 26.4      | 4.5      | 1.6    | 2.9      | 15   | 34    |
| 15 | 20200328        | 3.6       | 30.5      | 5.8      | 2.5    | 3.3      | 13   | 32    |
| 16 | 20200328        | 3.76      | 28.7      | 5.8      | 3      | 2.8      | 12   | 30    |
| 17 | 20200630        | 6.27      | 32        | 5.6      | 1.9    | 3.7      | 14   | 29    |
| 18 | 20200802        | 4.57      | 31.4      | 5.6      | 3.3    | 2.3      | 14   | 33    |
| 19 | 20200919        | 5.25      | 31.9      | 6.4      | 1.6    | 4.8      | 11   | 25    |
| 20 | 20200919        | 7.11      | 40.5      | 8.2      | 2.5    | 5.7      | 12   | 25    |
| 21 | 20201207        | 8.03      | 35.5      | 12.8     | 4      | 8.8      | 11   | 28    |
| 22 | 20201207        | 6.08      | 43.3      | 9.7      | 2.4    | 7.3      | 11   | 27    |
| 23 | 20210113        | 5.24      | 38        | 11.5     | 3.1    | 8.4      | 10   | 31    |
| 24 | 20210118        | 5.89      | 36.1      | 11.2     | 3      | 8.2      | 12   | 23    |
| 25 | 20210506        | 6.75      | 37.8      | 9.5      | 2.8    | 6.7      | 11   | 31    |
| 26 | 20210523        | 9.35      | 46.4      | 15.4     | 4.7    | 10.7     | 13   | 33    |
| 27 | 20210523        | 6.71      | 43.7      | 10.7     | 3.3    | 7.4      | 12   | 32    |
| 28 | 20220124        | 6.74      | 39.6      | 13       | 3.3    | 9.7      | 12   | 32    |
| 29 | 20220330        | 6.78      | 38.3      | 7.7      | 2.4    | 5.3      | 14   | 33    |
| 30 | 20220701        | 5.96      | 39.9      | 12       | 3.2    | 8.8      | 13   | 31    |

|    |                 | 8    | 9          | 10     | 11      | 12     | 13   |  |
|----|-----------------|------|------------|--------|---------|--------|------|--|
|    |                 | GGT  | ALP        | CK     | LDH     | TBA    | ADA  |  |
|    | unit            | U/L  | U/L        | U/L    | U/L     | μmol/L | U/L  |  |
|    | Reference value | 8-57 | 35.0-135.0 | 25-173 | 109-245 | 0-15.0 | 0-15 |  |
| 1  | 20190124        | 560  | 501.1      | 41     | 348     | 159.9  |      |  |
| 2  | 20190806        | 34   | 319.9      | 36     | 273     |        | 13   |  |
| 3  | 20190827        | 23   | 287.8      | 35     | 306     | 3.7    | 14   |  |
| 4  | 20190913        | 26   |            |        |         | 1.9    |      |  |
| 5  | 20190927        | 22   | 182.6      | 33     | 304     |        | 16   |  |
| 6  | 20190928        | 21   | 215.4      | 22     | 253     | 2.9    | 15   |  |
| 7  | 20191021        | 18   | 185.8      | 25     | 269     | 3.9    | 17   |  |
| 8  | 20191031        | 22   | 183.5      | 15     | 250     | 3.4    | 16   |  |
| 9  | 20191115        | 13   | 250.3      | 27     | 315     | 1.9    | 16   |  |
| 10 | 20191126        | 19   | 163.9      | 20     | 328     | 3.1    | 14   |  |
| 11 | 20191130        | 30   | 341.1      | 31     | 301     | 3.8    | 18   |  |
| 12 | 20191211        | 19   | 194.9      | 22     | 241     | 22     | 14   |  |
| 13 | 20200213        | 17   | 334.9      | 47     | 300     | 15.5   | 12   |  |
| 14 | 20200213        | 12   | 326.4      | 48     | 295     | 22.8   | 12   |  |
| 15 | 20200328        | 10   | 269.6      | 51     | 313     | 3.3    | 11   |  |
| 16 | 20200328        | 10   | 247.9      | 112    | 310     | 15.6   | 10   |  |
| 17 | 20200630        | 8    | 267        | 57     | 297     | 19.4   | 11   |  |
| 18 | 20200802        | 9    | 233        | 40     | 316     | 15.9   | 11   |  |
| 19 | 20200919        | 13   | 256        | 32     | 192     | 4.5    | 8    |  |
| 20 | 20200919        | 15   | 208.7      | 31     | 196     | 4.9    | 6    |  |
| 21 | 20201207        | 12   | 207.1      | 34     | 264     | 4.2    | 8    |  |
| 22 | 20201207        | 13   | 219.6      | 43     | 237     | 2.8    | 14   |  |
| 23 | 20210113        | 10   | 177.6      | 29     | 291     | 9.7    | 10   |  |
| 24 | 20210118        | 10   | 160.4      | 34     | 185     |        | 8    |  |
| 25 | 20210506        | 12   | 248.3      | 65     | 296     | 3.7    | 13   |  |
| 26 | 20210523        | 13   | 279        | 59     | 277     | 4.8    | 12   |  |
| 27 | 20210523        | 12   | 324.2      | 68     | 294     | 13     | 12   |  |
| 28 | 20220124        | 11   | 261.4      | 64     | 219     | 4      | 11   |  |
| 29 | 20220330        | 11   | 293.5      | 80     | 252     | 3.7    | 14   |  |
| 30 | 20220701        | 13   | 346        | 72     | 265     | 6.1    | 15   |  |
